# PodGPT: An audio-augmented large language model for research and education

Shuyue Jia<sup>1,\*</sup>, Subhrangshu Bit<sup>2,\*</sup>, Edward Searls<sup>3,\*</sup>, Meagan V. Lauber<sup>4,5</sup>, Lindsey A. Claus<sup>4,6</sup>, Pengrui Fan<sup>2</sup>, Varuna H. Jasodanand<sup>4</sup>, Divya Veerapaneni<sup>4,6</sup>, William M. Wang<sup>2</sup>, Rhoda Au<sup>3,4,7,8,9,10</sup> & Vijaya B. Kolachalama<sup>2,4,11,†</sup>

<sup>1</sup>*Department of Electrical & Computer Engineering, Boston University, MA, USA*

<sup>2</sup>*Department of Computer Science, Boston University, MA, USA*

<sup>3</sup>*Department of Anatomy and Neurobiology, Boston University Chobanian & Avedisian School of Medicine, Boston, MA, USA*

<sup>4</sup>*Department of Medicine, Boston University Chobanian & Avedisian School of Medicine, Boston, MA, USA*

<sup>5</sup>*Graduate Program for Neuroscience, Division of Graduate Medical Sciences, Boston University Chobanian & Avedisian School of Medicine, Boston, MA, USA*

<sup>6</sup>*Department of Surgery, Hospital of the University of Pennsylvania, Philadelphia, PA, USA*

<sup>7</sup>*Department of Neurology, The University of Texas Southwestern Medical Center, Dallas, TX, USA*

<sup>8</sup>*The Framingham Heart Study, Boston University Chobanian & Avedisian School of Medicine, Boston, MA, USA*

<sup>9</sup>*Department of Neurology, Boston University Chobanian & Avedisian School of Medicine, Boston, MA, USA*

<sup>10</sup>*Boston University Alzheimer's Disease Research Center, Boston, MA, USA*

<sup>11</sup>*Department of Epidemiology, Boston University School of Public Health, Boston, MA, USA*

<sup>12</sup>*Faculty of Computing & Data Sciences, Boston University, MA, USA*

\* These authors contributed equally to this work

†Corresponding author: Vijaya B. Kolachalama, PhD; Email: [vkola@bu.edu](mailto:vkola@bu.edu); ORCID: <https://orcid.org/0000-0002-5312-8644>

## 1 **Abstract**

2 The proliferation of scientific podcasts has generated an extensive repository of audio content, rich in spe-  
3 cialized terminology, diverse topics, and expert dialogues. Here, we introduce a computational framework  
4 designed to enhance large language models (LLMs) by leveraging this informational content from pub-  
5 licly accessible podcast data across science, technology, engineering, mathematics and medical (STEMM)  
6 disciplines. This dataset, comprising over 3,700 hours of audio content, was transcribed to generate over  
7 42 million text tokens. Our model, PodGPT, integrates this wealth of complex dialogue found in audio  
8 podcasts to improve understanding of natural language nuances, cultural contexts, as well as scientific and  
9 medical knowledge. PodGPT also employs retrieval augmented generation (RAG) on a vector database built  
10 from articles in Creative Commons PubMed Central and *The New England Journal of Medicine*, enhancing  
11 STEMM research and education by providing real-time access to emerging scientific literature. Evaluated  
12 across multiple benchmarks, PodGPT demonstrated an average improvement of 3.51 percentage points over  
13 standard open-source benchmarks and 3.81 percentage points when augmented with evidence from the RAG  
14 pipeline. Moreover, it showcased an average improvement of 4.06 percentage points in its zero-shot multi-  
15 lingual transfer ability, effectively generalizing to different linguistic contexts. By harnessing the untapped  
16 potential of podcast content, PodGPT advances natural language processing and conversational AI, offering  
17 enhanced capabilities for STEMM research and education.

1 The rise of generative artificial intelligence (AI), particularly large language models (LLMs), has  
2 marked a transformative shift in data analysis, interpretation, and content generation. These models, trained  
3 on extensive textual datasets, have demonstrated the ability to generate contextually accurate and linguisti-  
4 cally rich outputs, with profound implications for fields such as science and medicine, where models like  
5 OpenAI's GPT-4 have shown remarkable aptitude<sup>1-3</sup>. However, the full potential of LLMs in science, tech-  
6 nology, engineering, mathematics, and medicine (STEMM) remains under-explored, particularly in integrat-  
7 ing non-traditional data modalities such as audio content. Podcasts, which have proliferated across STEMM  
8 disciplines, present an untapped repository of expert knowledge, diverse terminologies, and emerging topics.  
9 The conversational nature of these recordings encapsulates domain-specific language and dialogue patterns,  
10 providing an opportunity to augment language models with rich, real-time, and contextually refined data.  
11 By integrating this dynamic source of information, language models could achieve greater precision and rel-  
12 evance within STEMM fields, enhancing their ability to handle complex topics, interdisciplinary discourse,  
13 and evolving knowledge landscapes inherent to STEMM.

14 Recent advances in transcription technologies have facilitated the transformation of spoken STEMM  
15 content into text suitable for computational analysis<sup>4</sup>. These technologies have enabled the development of  
16 models that could capture linguistic subtleties inherent in STEMM-related discussions and extract valuable  
17 insights from expert dialogue. By transcribing and processing this informative podcast content, it has become  
18 feasible to augment LLMs with audio-linguistic data, providing a means of refining their understanding of  
19 domain-specific language, reasoning, and contextual interactions<sup>5</sup>.

20 Here we present PodGPT (Fig. 1), a computational framework designed to leverage an extensive cor-  
21 pus of STEMM-based podcast content. Over 3,700 hours of audio were transcribed into over 42 million  
22 text tokens, enabling the model to absorb and learn from diverse expert discussions across multiple scien-  
23 tific fields. By integrating spoken content, we aim to enhance the model's understanding of conversational  
24 language and extend its application to more specialized contexts within STEMM disciplines. To further aug-  
25 ment the model's utility, we implemented a retrieval augmented generation (RAG) framework<sup>6,7</sup> utilizing  
26 a vector database built from articles in Creative Commons PubMed Central and *The New England Journal*  
27 *of Medicine* (NEJM). This database contained a heterogeneous and high-impact selection of medical and  
28 scientific literature, grounding PodGPT's outputs in peer-reviewed knowledge. The RAG approach was op-  
29 timized by applying hybrid search with binary quantization techniques to improve retrieval effectiveness  
30 and efficiency, followed by re-ranking to ensure accurate and context-aware responses. This computational  
31 framework allows PodGPT to retrieve and incorporate relevant scientific evidence into its generative process,  
32 ensuring linguistically coherent responses grounded by referenced sources.

33 The development of PodGPT positions it as a valuable tool for research and educational applications  
34 within STEMM, particularly in contexts requiring precise domain-specific knowledge. Its capacity to in-  
35 tegrate complex interdisciplinary conversations into language models highlights the potential of LLMs to  
36 support knowledge dissemination and professional development across STEMM disciplines. By bridging the  
37 gap between static text-based corpora and dynamic audio content, PodGPT exemplifies a forward-thinking  
38 approach to refining the capabilities of language models for scientific inquiry.

## 1 **Methods**

2 **Dataset description** We curated a diverse collection of podcasts across STEM disciplines under the  
3 Creative Commons Attribution (CC-BY) license as well as content from *The New England Journal of*  
4 *Medicine* (NEJM). The CC-BY license supports content sharing, adaptation, and use for any purpose, pro-  
5 vided appropriate credit is given. Various versions of the CC-BY license (*e.g.*, 1.0, 2.0, 3.0, and 4.0) outline  
6 specific attribution requirements and compatibility updates with international copyright standards. The lat-  
7 est version, CC-BY 4.0, offers enhanced flexibility by allowing sharing and adaptation across jurisdictions,  
8 making it widely applicable in research and educational contexts, as exemplified by our use of these podcasts  
9 for training PodGPT.

10 Our curated corpus was comprised of podcasts produced by scientific journals, researchers, and clin-  
11 icians, with topics spanning a multitude of different scientific fields. We filtered these podcasts based on  
12 the following criteria: (1) podcasts hosted by reputable scientific journals, such as NEJM; (2) podcasts pro-  
13 duced by individuals with recognized scientific, medical, or research expertise, including medical doctors  
14 (M.D.) and doctors of philosophy (Ph.D.), that encompassed various STEM fields. The full set of podcast  
15 episodes and associated metadata are detailed in Table 1.

16 **Dataset processing** The pretraining corpus for PodGPT consisted of thousands of hours of STEM  
17 podcasts, encompassing academic discussions, clinical case studies, and expert interviews. We transcribed  
18 these audio files using a state-of-the-art automatic speech recognition model, OpenAI Whisper<sup>8</sup>. Built  
19 upon an encoder-decoder Transformer architecture, the Whisper model resampled the input audio to 16,000  
20 Hz and performed temporal chunking. Then, these chunks of audio data were represented by 80-channel  
21 log-magnitude Mel spectrograms with a 25-millisecond window and 10-millisecond stride. Before being  
22 processed by the Transformer modules, the input underwent a convolutional layer and was augmented with  
23 the sinusoidal position embeddings to incorporate positional information. Finally, the Transformer decoder  
24 module interpreted the hidden representation of the audio data and generated textual output through a lan-  
25 guage head<sup>9</sup>. We utilized the latest Whisper series model, the Whisper large-v3, with 1,550M parameters,  
26 to specify the spoken language for improved speech recognition. All the podcast transcripts were carefully  
27 and manually reviewed to maintain content quality.

28 **Model architecture** The Transformer model<sup>10</sup>, renowned for its multi-head self-attention mechanism,  
29 has become the backbone of many state-of-the-art AI models. Unlike traditional methods, the self-attention  
30 mechanism captures long-range dependencies with efficient parallelization and scalability. Additionally, its  
31 deep feedforward neural networks enhance the model’s capacity to learn complex patterns in data. We lever-  
32 aged this architecture to tailor PodGPT specifically for use in STEM research and educational purposes.  
33 Built upon state-of-the-art general LLMs, such as Gemma<sup>11</sup> and LLaMA<sup>12</sup>, PodGPT was pre-trained on  
34 a diverse and informative text corpus extracted from STEM podcast data. By utilizing instruction-tuned  
35 variants of these models, we aimed to improve instruction-following capabilities and conversational struc-  
36 ture. To evaluate the effectiveness of our framework, we applied models of varying scales, ranging from 2  
37 to 8 billion parameters.

38 Gemma is a series of lightweight open models developed by Google DeepMind. These are text-to-  
39 text auto-regressive language models, which have pre-trained versions as well as instruction-tuned variants.

40 These models were trained on the textual datasets on a context length of 8,192 tokens from a wide variety  
41 of sources. The primary sources include web documents, codes, and mathematical content. Several recent  
42 advancements have been made to improve the performance and training efficiency of the Transformer model.  
43 These include multi-query attention<sup>13</sup>, rotary positional embeddings (RoPE)<sup>14</sup>, and GeGLU activations<sup>15</sup>.  
44 We utilized the Gemma models 2B and 7B to validate our framework across different model sizes. LLaMA is  
45 a family of advanced general-purpose LLMs released by Meta Research. The LLaMA 3.1 8B was pretrained  
46 using a context length up to 128K, facilitating longer context understanding with RoPE. Additionally, it  
47 employs the standard decoder-only architecture with improved efficiency using grouped-query attention  
48 with 8 key-value heads<sup>16</sup>.

49 Pre-training is a crucial step in the development of LLMs, during which the model learns from a  
50 vast body of text data in an auto-regressive manner. This phase generally leverages self-supervised learn-  
51 ing, employing methods like masked language modeling, *e.g.*, BERT<sup>17</sup>, or autoregressive modeling, *e.g.*,  
52 GPT<sup>18</sup>. The self-supervised learning framework allows the model to gain a broad understanding of knowl-  
53 edge, thereby improving its performance in subsequent tasks. In this work, we utilized an auto-regressive  
54 objective to perform continual pretraining through an iterative gradient solver. The above-mentioned LLMs  
55 have been pre-trained on trillions of tokens. Thus, one cost-effective and efficient way to encode domain-  
56 specific knowledge is through continuous pre-training and evolving the pre-trained models with expertise  
57 corpora, instead of retraining them from scratch. The podcast transcripts were represented by a sequence of  
58 tokens, *i.e.*,  $\mathbf{x} = \{x_1, x_2, \dots, x_N\}$ , where  $x_i$  is a subword token and  $N$  denotes the length of the sequence.  
59 We fine-tuned publicly available models using our podcast data in an auto-regressive manner, optimizing  
60 the models by minimizing the negative log likelihood. The training objective is as follows,

$$\mathcal{L}_{\pi_{\theta}} = - \sum \log(\pi_{\theta}(x_i | \mathbf{x}_{<i})),$$

61 where  $\pi_{\theta}$  is the language model, parameterized by  $\theta$ .

62 **Retrieval augmented generation framework** To ensure PodGPT is aligned with the latest advance-  
63 ments in STEM research and education, we integrated a retrieval augmented generation (RAG) system  
64 into its computational framework. This system facilitates the continuous search and retrieval of up to date  
65 information from PubMed Central<sup>19</sup>, the free archive of life science journal articles managed by the Na-  
66 tional Institutes of Health (NIH), United States. The NIH offered an FTP server for bulk downloading large  
67 sets of non-commercially licensed public articles, which we utilized to ground text generation in PodGPT.  
68 Additionally, the latest articles from NEJM since 2016 were also incorporated into our database, providing  
69 a wide range of content for medical research and education. The retrieved articles used to generate and  
70 ground the responses were meticulously cited in MLA format, ensuring proper attribution and ease of ref-  
71 erence. This citation style facilitated clear acknowledgment of the original sources while maintaining the  
72 academic integrity of the outputs. By integrating these citations directly into the generated text, PodGPT  
73 ensured that users could trace back the evidence to peer-reviewed and credible scientific literature, further  
74 enhancing trustworthiness and usability for research and educational purposes.

75 To fully utilize the content, the first step was to preprocess article bodies into shorter text samples, de-  
76 termined by the hyper-parameters of the vectorization neural networks. Then, we encoded these text chunks  
77 using two embedding models. Specifically, we used two types of embeddings: a dense embedding, which is  
78 a compact vector that captures semantic similarity between different contexts, and a sparse vector, with the  
79 length of the vocabulary size, *e.g.*, 30K. In the sparse vector, each position corresponds to a subword token,

80 enabling highly efficient keyword searches. We selected state-of-the-art open-source embedding models  
81 for both dense and sparse embeddings: the Salesforce Research SFR-Embedding-2<sup>20</sup> and the opensearch-  
82 neural-sparse-encoding-v1 model from the OpenSearch Project<sup>21</sup>. To enhance efficiency, we implemented  
83 the 4-bit GPTQ quantization<sup>22</sup> on the Salesforce model. The similarity search was performed using cosine  
84 similarity for dense vectors and inner product for sparse vectors, as specified in these models.

85 Furthermore, to improve retrieval performance for the dense vector, we employed a two-stage retrieve-  
86 rerank approach. In this method, we initially conducted binary quantization for top- $K$  retrieval, returning  
87 the most relevant top- $N$  documents from our 4-bit quantized model. Then, we re-ranked the results based  
88 on similarity scores using a reranker. The samples that had the shortest distance were re-ranked and passed  
89 into the reranker model, which assigned relevance scores to each document. We selected the BAAI general  
90 embedding model, bge-reranker-large<sup>23</sup>, a publicly available top-performing re-ranking model. Reranking  
91 allows a hybrid search that combines specialized embedding models for document retrieval with the gener-  
92 ation of re-ranked relevance scores for the model's use.

93 The database, vector search, and indexing were all managed by a vector database system pgvector<sup>24</sup>, a  
94 PostgreSQL extension that implements vector distance searches and the hierarchical navigable small worlds  
95 (HNSW) algorithm with standard SQL tools, enabling efficient pipeline development with familiar APIs.

96 **Experimental settings** To analyze the capabilities of PodGPT, we employed various model sizes and  
97 conducted extensive experiments across STEM fields in a multilingual context. In current literature,  
98 benchmarks for multiple-choice question-answering (QA) were commonly utilized to evaluate the per-  
99 formance of large language models. Thus, in this work, we utilized the multilingual multiple-choice QA  
100 benchmarks to evaluate the model's performance. In addition, we conducted experiments and documented  
101 the performance of all the models that were used in this study on multilingual STEM benchmarks. This  
102 potentially advances the field with an open-source and unified multilingual benchmarking library covering  
103 training, inference, answer extraction, performance evaluation, real-world model deployment, as well as a  
104 pipeline of RAG for evidence-based medicine (EBM). Furthermore, to guarantee scientific reproducible re-  
105 search, we implemented all our experiments with a set of unified hyper-parameters. Thus, our work was out  
106 of the box without any specific hyper-parameter tuning and further optimization for different models.

107 **Evaluation benchmarks** To evaluate the performance of PodGPT, we utilized a comprehensive set of  
108 STEM benchmarks from the most spoken languages in the world, including English, Mandarin, French,  
109 Spanish, and Hindi. For intra-language experiments, *i.e.*, English, we performed performance evaluations on  
110 datasets where the language aligned with the podcast content. Furthermore, for cross-language experiments,  
111 the model was evaluated on benchmarks in different languages compared to the podcasts. This evaluation  
112 was crucial for validating the effectiveness of the zero-shot multilingual transfer capability of medical LLMs.  
113 Our multilingual benchmarking approach not only demonstrates that our model is accurate and effective  
114 across varied linguistic contexts, but that it represents a technical achievement with the power to democratize  
115 global access to science, research, and educational knowledge. The detailed descriptions of multilingual  
116 benchmarks are as follows.

117 *STEMM benchmarks in English* The benchmarks for STEMM natural language understanding in English  
118 have advanced significantly over the past decade. In this study, we selected well-known publicly accessible



119 benchmarks including MedQA<sup>25</sup>, PubMedQA<sup>26</sup>, MedMCQA<sup>27</sup>, MedExpQA<sup>28</sup>, and MMLU STEM  
120 datasets, including subsets from physics (astronomy, college physics, conceptual physics, and high school  
121 physics), biology (college biology and high school biology), chemistry (college chemistry and high school  
122 chemistry), computer science (college computer science, computer security, high school computer sci-  
123 ence, and machine learning), engineering (electrical engineering), mathematics (abstract algebra, college  
124 mathematics, elementary mathematics, high school mathematics, and high school statistics), and medicine  
125 (anatomy, clinical knowledge, college medicine, medical genetics, professional medicine)<sup>29</sup>. Additionally,  
126 we incorporated the college biology question set into the MMLU medicine subset to ensure a fair compari-  
127 son, as it was widely used to evaluate large medical language models<sup>30</sup>.

128 *STEMM benchmarks in Mandarin* The benchmarking of medical and clinical knowledge in Mandarin has  
129 become increasingly popular in NLP research. A range of databases have been successively proposed to  
130 assess the performance of Mandarin language models on medical data. In this study, we adopted the pop-  
131 ular MedQA-MCMLE<sup>25</sup> and CMMU STEM topics<sup>30,31</sup>. The CMMLU STEM benchmarks include  
132 the subsets from physics (astronomy, conceptual physics, and high school physics), biology (high school  
133 biology), chemistry (high school chemistry), computer science (computer science, machine learning, and  
134 computer security), mathematics (college actuarial science, college mathematics, elementary mathematics,  
135 high school mathematics, and college medical statistics), engineering (college engineering hydrology and  
136 electrical engineering), and medicine (anatomy, clinical knowledge, college medicine, genetics, nutrition,  
137 traditional Chinese medicine, and virology)<sup>31</sup>.

138 *STEMM benchmarks in Spanish* The Spanish STEM testbed has encouraged the NLP community to de-  
139 velop new approaches for understanding and reasoning about science, research, and educational knowledge  
140 in Spanish. Therefore, we utilized the HEAD-QA benchmark, a multiple-choice healthcare dataset obtained  
141 from examinations in the Spanish healthcare system<sup>32</sup>. Additionally, we also employed the MedExpQA  
142 Spanish subset<sup>28</sup> and Spanish MMLU STEM topics<sup>30</sup>.

143 *STEMM benchmarks in French* We primarily selected the popular FrenchMedMCQA dataset, which consists  
144 of 3,105 questions taken from the French pharmacy diploma examinations<sup>33</sup>. Following Wang et al., we  
145 only performed performance evaluations on questions with a single answer<sup>30</sup>. As a result, the total number  
146 of questions in the testing set was 321. Furthermore, the MedExpQA French subset<sup>28</sup> and French MMLU  
147 STEM topics<sup>30</sup> were also included in this work.

148 *STEMM benchmarks in Hindi* To encode STEM content in Hindi, we included the Hindi MMLU STEM  
149 topics<sup>30</sup> in our benchmarking. By evaluating our model’s ability to understand science, research, and med-  
150 ical terminology in Hindi, we were able to incorporate one of the most widely spoken languages in the  
151 world.

152 **Implementation details** We transcribed podcast data using the OpenAI Whisper large-v3 model for an  
153 automatic speech recognition task. The chunk length was set to 30 seconds with a 5-second stride on both  
154 sides to improve the continuity and coherence of the transcriptions. The batch size was 96, and 384 tokens  
155 were generated per chunk to parallelly process audio chunks.

156 We encoded STEM knowledge across various model sizes, from 2B to 8B. To do so, we imple-

157 mented publicly available language models, which include the 2B and 7B versions of the Gemma series and  
158 the instruction-tuned variant of the LLaMA 3.1 8B. During model training, we utilized Brain float 16 data  
159 type with the AdamW optimizer to prevent overflow issues<sup>34</sup>, and the context length was set to 2,048<sup>30</sup>.  
160 We trained all models for 5 epochs with an initial learning rate of  $5 \times 10^{-6}$  with a 0.03 warm-up ratio and  
161 a cosine schedule. The weight decay rate was 0.01, and the gradient was accumulated during each training  
162 step. All the models were optimized based on the unified hyper-parameter settings without specific tuning  
163 for superior performance. To deploy a highly performant and efficient RAG pipeline, we selected the top-  
164  $K = 10,000$  document samples using the binary quantized embedding model. Next, we retrieved the text  
165 samples from the top- $N = 15$  dense embeddings and the top- $N = 15$  sparse embeddings by similarity  
166 score. Finally, we used only the documents that had reranking scores greater than 1.0.

167 **Software and database infrastructure** We created a custom graphical user interface (GUI) and plat-  
168 form infrastructure to allow users to interact with PodGPT, providing public access to our model. Our goal  
169 was to deliver our model with a user-friendly and responsive conversational interface. We utilized ReactJS  
170 and NextJS for the front end. ReactJS furnishes a collection of APIs and libraries to construct reusable web  
171 components, while NextJS provides scaffolding for ReactJS applications, encompassing an HTTP server,  
172 server-side rendering, and a “back end for a front end” design pattern. For hardware, we utilized a custom-  
173 built stack to deploy our LLMs at scale using entirely self-hosted and open-source tools without relying on  
174 software as a service (SaaS) or proprietary software. We employed a microservice architecture using Kuber-  
175 netes as a container orchestration tool. Kubernetes manages clusters of nodes hosting microservices wrapped  
176 inside Docker containers. It facilitates the creation of highly available distributed systems that automatically  
177 scale to meet needs and ensure secure inter-cluster communication, IP address allocation, load balancing,  
178 and reverse proxy services. For LLM deployment, we employed the vLLM library<sup>35</sup>, which offers a fast and  
179 portable inference server that deploys transformers and batches inference tasks efficiently while providing  
180 a convenient API. It requires a minimum of CUDA Toolkit 11.0 and a 7.5 compute-capable NVIDIA GPU,  
181 supporting splitting model weights across several devices.

182 Authentication and user management were crucial components of our architecture. In order to dis-  
183 tribute resources equitably among potential researchers, we implemented OAuth 2.0 compliant authoriza-  
184 tion and user management in addition to a per-token rate limiting system based on user scopes and total  
185 system load. We equipped PodGPT with standard chatbot features such as multiturn conversations and the  
186 ability to open new conversations. Furthermore, PodGPT utilized Apache Cassandra, a distributed NoSQL  
187 database designed for high availability and query optimization. The backend API router, which was built  
188 with Flask, stores new chats and conversations in Cassandra and sends text inference requests to a queue.  
189 For queuing and message processing, we utilized RabbitMQ and Redis, which are a message broker and  
190 key-value databases, respectively.

191 **Data and model availability** A multilingual LLMs benchmarking library along with the source codes  
192 are made available at [github.com/vkola-lab/PodGPT](https://github.com/vkola-lab/PodGPT). Our models are available at [huggingface.co/vkola-lab](https://huggingface.co/vkola-lab).



## 1 Results

2 We conducted comprehensive experiments to assess PodGPT’s performance on various multilingual STEM  
3 QA benchmark datasets. Our results broadly demonstrate that incorporating STEM audio podcast data en-  
4 hances our model’s ability to understand and generate precise and comprehensive information. In addition,  
5 our enhanced models outperformed their respective baselines across a wide range of scales in both in-domain  
6 benchmarks and zero-shot domain generalization across multilingual benchmarks.

7 **Performance on in-domain benchmarks** The evaluation of PodGPT across a wide spectrum of dis-  
8 ciplines in MMLU benchmarks demonstrated enhanced model efficacy following pre-training with STEM  
9 podcast data (Table 2). Across all MMLU STEM benchmarks, PodGPT achieved performance gains of  
10 9.73 percentage points for the LLaMA 8B model and 3.49 percentage points for the Gemma 7B model.  
11 Specifically, on the MMLU physics benchmark subset, PodGPT outperformed the baseline by 12.36 per-  
12 centage points. In MMLU biology benchmarks, there were 8.62 percentage points improvement for the  
13 LLaMA 8B model and 3.11 for the Gemma 7B model. Additionally, the Gemma 2B model showed enhance-  
14 ments of 3.61 percentage points on the MMLU computer science datasets. Evaluation of the engineering  
15 subset revealed that PodGPT achieved improvements of 10.34 and 3.80 percentage points for the LLaMA  
16 8B and Gemma 7B models, respectively. Moreover, on the MMLU mathematics benchmark, PodGPT con-  
17 sistentlly outperformed the baseline, with the Gemma 7B model improving by 4.26 percentage points and  
18 the LLaMA 8B model improving by 4.25 percentage points. Lastly, on the medical datasets, PodGPT ex-  
19 hibited improvements of 10.29 percentage points for the LLaMA 8B model and 5.26 for the Gemma 7B  
20 model. Overall, PodGPT demonstrated cumulative enhancements of 3.51 percentage points over standard  
21 open-source benchmarks and 3.13 percentage points across in-domain MMLU benchmarks. These results  
22 underscored the potential of leveraging open-source podcast data to significantly boost model performance  
23 and applicability across specialized STEM domains, paving the way for more effective and versatile AI  
24 systems for research and education.

25 As shown in Table 3, we further evaluated PodGPT across various English medical QA benchmarks  
26 after pre-training with English medical podcast data with the RAG pipeline. This framework consistently  
27 surpassed baseline models, achieving an improvement of up to 13.00 percentage points, highlighting the  
28 effectiveness of grounding language models with the latest scientific evidence. On the MedExpQA bench-  
29 mark, our framework demonstrated an improvement of 12.20 percentage points for the Gemma 7B model.  
30 The other models also exhibited strong performance enhancements of 4.80 and 2.80 percentage points for the  
31 Gemma 2B and LLaMA 8B models, respectively. Additionally, PodGPT with RAG excelled on the MedQA  
32 benchmark, achieving an average increase of up to 4.04 percentage points. On the MMLU medicine bench-  
33 mark, promising improvements were observed, with gains of 5.97 and 3.54 percentage points for the Gemma  
34 7B and LLaMA 8B models, respectively. Finally, on the MedMCQA benchmark, the Gemma 7B model with  
35 RAG surpassed the baseline by 2.90 percentage points. Overall, PodGPT with RAG demonstrated a cumu-  
36 lative enhancement of 3.81 percentage points across in-domain medical benchmarks, emphasizing its effec-  
37 tiveness in advancing medical education and research through the incorporation of evidence-based medicine  
38 with RAG.

39 **Zero-shot cross-lingual performance** In Table 4, we presented results on PodGPT’s zero-shot cross-  
40 lingual performance using multilingual benchmarks, encompassing diverse STEM subjects such as physics,

41 biology, chemistry, computer science, engineering, mathematics, and medicine. PodGPT demonstrated per-  
42 formance gains across all benchmarks, achieving improvements of up to 7.06 percentage points. The LLaMA  
43 8B model achieved an improvement of 13.60 percentage points on the MedQA-MCMLE benchmark, show-  
44 casing its strong cross-lingual capabilities. Additionally, it delivered superior performance on the CMMLU  
45 benchmarks, achieving average improvements of up to 6.80 percentage points. The LLaMA 8B model  
46 demonstrated outstanding performance gains of 19.99, 11.53, 10.34, and 10.32 percentage points on CMMLU  
47 benchmarks focusing on chemistry, mathematics, physics, and computer science, respectively. Furthermore,  
48 the Gemma 7B model achieved increases of 7.57 and 7.14 percentage points on the CMMLU chemistry  
49 and computer science benchmarks, separately, highlighting the model’s robustness across diverse STEM  
50 disciplines.

51 On the MedExpQA benchmark, PodGPT achieved performance gains of 9.40 percentage points for  
52 the Gemma 7B model and 4.60 percentage points for the LLaMA 8B model. It also outperformed the base-  
53 line model on the MedMCQA benchmark, with improvements of 10.05 percentage points for Gemma 7B  
54 and 9.66 for LLaMA 8B. In addition, the LLaMA 8B model showcased an average improvement of 8.41  
55 percentage points across French STEM benchmarks, while the Gemma 7B model achieved an average in-  
56 crease of 4.01 percentage points. Specifically, LLaMA 8B demonstrated an improvement of 9.76 percentage  
57 points on the chemistry subset, 8.18 on the mathematics subset, 7.84 on the computer science subset, and  
58 5.63 on the engineering subset. On the French MMLU physics and biology subsets, PodGPT showed im-  
59 provement, with gains of 7.07 and 6.88 percentage points for the Gemma 7B model. Additionally, PodGPT  
60 consistently surpassed the baseline models, achieving improvements of 5.75 percentage points with the  
61 Gemma 7B model and 5.24 percentage points with the LLaMA 8B model.

62 On the Hindi MMLU STEM benchmarks, PodGPT achieved a performance gain, with an increase  
63 of 8.86 percentage points for the LLaMA 8B model. Additionally, the Gemma 7B model showed improve-  
64 ments of 9.80 on the biology benchmark, while the LLaMA 8B model beat the baseline by 8.75 percentage  
65 points for the chemistry benchmark. Additionally, on the Hindi MMLU medicine benchmark, PodGPT  
66 demonstrated an improvement of 6.26 percentage points for the Gemma 7B model. Lastly, the performance  
67 on the Spanish STEM benchmarks was equally promising, with improvements of 12.87 percentage points  
68 and 10.20 percentage points on the HEAD-QA and MedExpQA benchmarks, respectively, for the LLaMA  
69 8B model. Across the Spanish MMLU STEM benchmarks, PodGPT achieved enhancements of up to  
70 9.70 percentage points. Overall, PodGPT demonstrated its superiority by enhancing its zero-shot multilin-  
71 gual transfer capability in Spanish, achieving an average improvement of up to 7.45 percentage points. In  
72 summary, PodGPT showcased an impressive average improvement of 4.06 percentage points across mul-  
73 tilingual STEM benchmarks in its zero-shot transfer capabilities. These results underscored PodGPT’s  
74 effectiveness in generalizing across diverse linguistic contexts, further highlighting its potential for advanc-  
75 ing multilingual applications in research and education.

76 **Evaluation of subject-specific queries** Our PodGPT model, integrated with the RAG framework, suc-  
77 cessfully generated up to date, relevant, and citation-supported responses to specialized STEM queries,  
78 as demonstrated in Fig. 2. This integration empowered PodGPT to leverage a vector database of scientific  
79 literature, enabling the delivery of evidence-based answers underpinned by peer-reviewed references. Each  
80 response contained a relevance score, ensuring alignment between retrieved references and the query, and  
81 prioritizing highly pertinent sources while minimizing unrelated content. This approach significantly bol-  
82 stered the reliability and precision of the generated outputs, as evidenced by consistently high relevance

83 scores across diverse STEM examples. In the examples shown in Fig. 2, we showed the effectiveness of  
84 PodGPT in addressing queries spanning endocrinology, infectious diseases, cardiovascular health, neuro-  
85 science, and planetary health.

## 1 Discussion

2 We present PodGPT, a large language model that leverages the rich and diverse linguistic content of STEM  
3 podcasts, capturing a wide array of domain-specific terminologies and conversational contexts. Exten-  
4 sive pre-training on podcast data has endowed PodGPT with the capability to generate topically relevant  
5 and scientifically up to date responses to highly specialized STEM-related queries across different lan-  
6 guages. When benchmarked against existing datasets such as MedQA, PubMedQA, MedMCQA, and vari-  
7 ous MMLU STEM categories, PodGPT demonstrated superior performance, particularly in areas requir-  
8 ing detailed medical knowledge and contextual understanding. We leveraged a RAG framework with a vector  
9 database constructed from journal articles, enabling real-time access to emerging scientific literature. These  
10 results not only highlight its potential as a valuable tool for research and education, but also to democratize  
11 science globally through its accessibility and multilingual capabilities.

12 Our results demonstrate that integrating audio-transcribed data into language model training improves  
13 the accuracy and relevance of information generated, particularly in STEM contexts. Compared to base-  
14 line models such as Google Gemma and Meta LLaMA, PodGPT consistently achieved higher performance  
15 across multiple benchmarks, including in-domain STEM tasks and zero-shot multilingual evaluations.  
16 By leveraging transcribed audio, PodGPT effectively captures conversational dynamics, domain-specific  
17 terminologies, and interdisciplinary dialogue patterns that are often absent in text-only training data. This  
18 integration enables more precise language processing and a broader understanding of complex topics. The  
19 implications of this work extend beyond benchmark performance. First, PodGPT underscores the impor-  
20 tance of integrating diverse modalities, such as audio-transcribed text, into language model training to ad-  
21 dress linguistic subtleties and interdisciplinary dialogue patterns that static text corpora alone cannot en-  
22 capsulate. This inclusion strengthens the model's robustness, enabling not only superior performance on  
23 standard benchmarks but also enhanced generalization to multilingual and multidisciplinary applications.  
24 Second, the integration of a RAG framework equips PodGPT with real-time access to evolving scientific  
25 literature, providing researchers, educators, and practitioners with evidence-grounded insights that remain  
26 current and actionable. This capability bridges the gap between traditional language model outputs and  
27 dynamic, evidence-based decision-making, particularly in fast-evolving STEM fields. Finally, PodGPT's  
28 demonstrated success across multilingual STEM benchmarks positions it as a transformative tool for de-  
29 mocratizing access to education and research globally. By breaking down language and geographic barriers,  
30 PodGPT has the potential to promote equitable access to scientific knowledge, enabling underserved and  
31 linguistically diverse communities to engage with cutting-edge research. As the global demand for interdis-  
32 ciplinary collaboration and education grows, PodGPT serves as an example of how language models can  
33 evolve to meet these challenges by integrating innovative data modalities and frameworks.

34 Our study has a few limitations. First, we were limited to using STEM podcast content that was  
35 openly accessible or publicly available. As such, there is a vast collection of available but unharnessed data,  
36 such as textbooks and even video tutorials, that could be leveraged if licensing guidelines allowed. Our  
37 model, trained exclusively on English podcasts, demonstrated strong performance on established bench-  
38 marks and improved zero-shot capabilities on multilingual evaluation tasks. Future efforts will focus on  
39 acquiring diverse and legally accessible podcast data in multiple languages as well as more peer-reviewed  
40 journal content to enrich training and enhance multilingual model performance. Future work on PodGPT  
41 should also include a comprehensive ethical evaluation to ensure the model consistently adheres to high sci-  
42 entific and research standards in a wide range of settings. Also, we observed that pre-training using podcast  
43 data did not improve performance on a few benchmarks. This finding can be attributed to the nature and

44 structure of podcasts, which contrasts with the demands of these benchmarks.

45         The findings from this study indicate that PodGPT represents an important advancement in tailoring  
46 large language models for research and education. Its true potential, however, lies in democratizing access  
47 to scientific information globally. Its ability to process domain-specific queries, generate responses using  
48 the most up to date information available, including in-chat citations, and operate across multiple languages  
49 makes PodGPT a valuable tool. Nonetheless, deploying these advanced models must be accompanied by  
50 rigorous attention to data integrity and user privacy considerations. By continuing to advance the intersection  
51 of AI and science, we can ultimately improve the global accessibility of STEMM research and education,  
52 ensuring that such technologies benefit a broader range of people. PodGPT highlights the value of integrating  
53 podcast data to enhance language models, which can be extended to applications beyond just science and  
54 research by incorporating diverse audio podcasts.

## 1 **Acknowledgments**

2 This project was supported by grants from the Karen Toffler Charitable Trust (V.B.K.), the National Institute  
3 on Aging's Artificial Intelligence and Technology Collaboratories (P30-AG073104 and P30-AG073105,  
4 V.B.K.), the American Heart Association (20SFRN35460031, V.B.K. & R.A.), Gates Ventures (R.A. &  
5 V.B.K.), and the National Institutes of Health (R01-HL159620 [V.B.K.], R01-AG083735 [R.A. & V.B.K.],  
6 R01-AG062109 [R.A. & V.B.K.], and U19-AG068753 [R.A.]).

## 7 **Author contributions**

8 S.J., S.B., and E.S. contributed equally to this work. S.J., S.B., L.A.C., P.F., V.H.J., M.V.L., and D.V. curated  
9 and processed the data. S.J. and S.B. performed model training. E.S. developed the RAG framework. S.J.,  
10 S.B., L.A.C., P.F., V.H.J., M.V.L., E.S., D.V. and W.M.W. generated the results. R.A. provided clinical and  
11 scientific context. V.B.K. drafted the initial manuscript. All authors reviewed, edited, and approved the  
12 manuscript. V.B.K. conceived, designed, and directed the study.

## 13 **Ethics declarations**

14 V.B.K. is a co-founder and equity holder of deepPath Inc. and CogniScreen, Inc. He also serves on the  
15 scientific advisory board of Altoida Inc. R.A. is a scientific advisor to Signant Health and NovoNordisk.  
16 The remaining authors declare no competing interests.



## 1 References

- 2 1. Thirunavukarasu, A. J. *et al.* Large language models in medicine. *Nature Medicine* **29**, 1930–1940  
3 (2023).
- 4 2. Telenti, A. *et al.* Large language models for science and medicine. *European Journal of Clinical In-*  
5 *vestigation* **54**, e14183 (2024). URL [https://onlinelibrary.wiley.com/doi/abs/10.](https://onlinelibrary.wiley.com/doi/abs/10.1111/eci.14183)  
6 [1111/eci.14183](https://onlinelibrary.wiley.com/doi/pdf/10.1111/eci.14183). E14183 EJCI-2023-1951.R1, [https://onlinelibrary.wiley.com/](https://onlinelibrary.wiley.com/doi/pdf/10.1111/eci.14183)  
7 [doi/pdf/10.1111/eci.14183](https://onlinelibrary.wiley.com/doi/pdf/10.1111/eci.14183).
- 8 3. Bzdok, D. *et al.* Data science opportunities of large language models for neuroscience and  
9 biomedicine. *Neuron* **112**, 698–717 (2024). URL [https://www.sciencedirect.com/](https://www.sciencedirect.com/science/article/pii/S0896627324000424)  
10 [science/article/pii/S0896627324000424](https://www.sciencedirect.com/science/article/pii/S0896627324000424).
- 11 4. Xu, C. *et al.* Recent advances in direct speech-to-text translation. In Elkind, E. (ed.) *Proceedings*  
12 *of the Thirty-Second International Joint Conference on Artificial Intelligence, IJCAI-23*, 6796–6804  
13 (International Joint Conferences on Artificial Intelligence Organization, 2023). URL [https://doi.](https://doi.org/10.24963/ijcai.2023/761)  
14 [org/10.24963/ijcai.2023/761](https://doi.org/10.24963/ijcai.2023/761). Survey Track.
- 15 5. Ling, C. *et al.* Domain specialization as the key to make large language models disruptive: A compre-  
16 hensive survey (2024). URL <https://arxiv.org/abs/2305.18703>. 2305.18703.
- 17 6. Guu, K., Lee, K., Tung, Z., Pasupat, P. & Chang, M. Retrieval augmented language model pre-training.  
18 In III, H. D. & Singh, A. (eds.) *Proceedings of the 37th International Conference on Machine Learning*,  
19 vol. 119 of *Proceedings of Machine Learning Research*, 3929–3938 (PMLR, 2020). URL [https:](https://proceedings.mlr.press/v119/guu20a.html)  
20 [//proceedings.mlr.press/v119/guu20a.html](https://proceedings.mlr.press/v119/guu20a.html).
- 21 7. Lewis, P. *et al.* Retrieval-augmented generation for knowledge-intensive nlp tasks. In  
22 Larochelle, H., Ranzato, M., Hadsell, R., Balcan, M. & Lin, H. (eds.) *Advances in Neu-*  
23 *ral Information Processing Systems*, vol. 33, 9459–9474 (Curran Associates, Inc., 2020).  
24 URL [https://proceedings.neurips.cc/paper\\_files/paper/2020/file/](https://proceedings.neurips.cc/paper_files/paper/2020/file/6b493230205f780e1bc26945df7481e5-Paper.pdf)  
25 [6b493230205f780e1bc26945df7481e5-Paper.pdf](https://proceedings.neurips.cc/paper_files/paper/2020/file/6b493230205f780e1bc26945df7481e5-Paper.pdf).
- 26 8. Radford, A. *et al.* Robust speech recognition via large-scale weak supervision. In *International Con-*  
27 *ference on Machine Learning (ICML)*, 28492–28518 (PMLR, 2023).
- 28 9. Press, O. & Wolf, L. Using the output embedding to improve language models. In Lapata, M., Blunsom,  
29 P. & Koller, A. (eds.) *Proceedings of the 15th Conference of the European Chapter of the Association*  
30 *for Computational Linguistics: Volume 2, Short Papers*, 157–163 (Association for Computational Lin-  
31 *guistics, Valencia, Spain, 2017).*
- 32 10. Vaswani, A. *et al.* Attention is all you need. In *Proceedings of the 31st International Conference on*  
33 *Neural Information Processing Systems, NIPS’17*, 6000–6010 (Curran Associates Inc., Red Hook, NY,  
34 USA, 2017).
- 35 11. Team, G. *et al.* Gemma: Open models based on gemini research and technology (2024). URL [https:](https://arxiv.org/abs/2403.08295)  
36 [//arxiv.org/abs/2403.08295](https://arxiv.org/abs/2403.08295). 2403.08295.
- 37 12. Touvron, H. *et al.* LLaMA: Open and efficient foundation language models (2023). URL [https:](https://arxiv.org/abs/2302.13971)  
38 [//arxiv.org/abs/2302.13971](https://arxiv.org/abs/2302.13971). 2302.13971.

- 39 13. Shazeer, N. Fast transformer decoding: One write-head is all you need (2019). URL <https://arxiv.org/abs/1911.02150>. 1911.02150.
- 41 14. Su, J. *et al.* Roformer: Enhanced transformer with rotary position embedding. *Neurocomputing*  
42 **568**, 127063 (2024). URL [https://www.sciencedirect.com/science/article/pii/](https://www.sciencedirect.com/science/article/pii/S0925231223011864)  
43 S0925231223011864.
- 44 15. Shazeer, N. GLU variants improve transformer (2020). URL [https://arxiv.org/abs/2002.](https://arxiv.org/abs/2002.05202)  
45 05202. 2002.05202.
- 46 16. Ainslie, J. *et al.* GQA: Training generalized multi-query transformer models from multi-head check-  
47 points. In *Proceedings of the 2023 Conference on Empirical Methods in Natural Language Processing*,  
48 4895–4901 (2023).
- 49 17. Devlin, J., Chang, M.-W., Lee, K. & Toutanova, K. BERT: Pre-training of deep bidirectional Trans-  
50 formers for language understanding. In *Proceedings of the 2019 Conference of the North American*  
51 *Chapter of the Association for Computational Linguistics: Human Language Technologies, Volume 1*  
52 *(Long and Short Papers)*, 4171–4186 (2019).
- 53 18. Brown, T. *et al.* Language models are few-shot learners. *Advances in Neural Information Processing*  
54 *Systems (NeurIPS)* **33**, 1877–1901 (2020).
- 55 19. National Library of Medicine. Pubmed central (2024). URL [https://www.ncbi.nlm.nih.](https://www.ncbi.nlm.nih.gov/pmc/)  
56 gov/pmc/. National Center for Biotechnology Information, U.S. National Library of Medicine.
- 57 20. Meng, R. *et al.* SFR-Embedding-2: Advanced text embedding with multi-stage training (2024). URL  
58 [https://huggingface.co/Salesforce/SFR-Embedding-2\\_R](https://huggingface.co/Salesforce/SFR-Embedding-2_R).
- 59 21. Geng, Z., Ru, D. & Yang, Y. Towards competitive search relevance for inference-free learned sparse  
60 retrievers (2024). URL <https://arxiv.org/abs/2411.04403>. 2411.04403.
- 61 22. Frantar, E., Ashkboos, S., Hoefler, T. & Alistarh, D. GPTQ: Accurate post-training compression for  
62 generative pretrained transformers. In *The Eleventh International Conference on Learning Representa-*  
63 *tions (ICLR)* (2023).
- 64 23. Xiao, S., Liu, Z., Zhang, P. & Muennighoff, N. C-Pack: Packaged resources to advance general chinese  
65 embedding (2023). 2309.07597.
- 66 24. Pgvector Development Team. pgvector: Open-source vector similarity search for PostgreSQL (2024).  
67 URL <https://github.com/pgvector/pgvector>. GitHub repository.
- 68 25. Jin, D. *et al.* What disease does this patient have? A large-scale open domain question answering dataset  
69 from medical exams. *Applied Sciences* **11**, 6421 (2021).
- 70 26. Jin, Q., Dhingra, B., Liu, Z., Cohen, W. & Lu, X. PubMedQA: A dataset for biomedical research ques-  
71 tion answering. In Inui, K., Jiang, J., Ng, V. & Wan, X. (eds.) *Proceedings of the 2019 Conference on*  
72 *Empirical Methods in Natural Language Processing and the 9th International Joint Conference on Nat-*  
73 *ural Language Processing (EMNLP-IJCNLP)*, 2567–2577 (Association for Computational Linguistics,  
74 Hong Kong, China, 2019).
- 75 27. Pal, A., Umapathi, L. K. & Sankarasubbu, M. MedMCQA: A large-scale multi-subject multi-choice  
76 dataset for medical domain question answering. In Flores, G., Chen, G. H., Pollard, T., Ho, J. C. &  
77 Naumann, T. (eds.) *Proceedings of the Conference on Health, Inference, and Learning*, vol. 174 of  
78 *Proceedings of Machine Learning Research*, 248–260 (PMLR, 2022).

- 79 28. Alonso, I., Oronoz, M. & Agerri, R. MedExpQA: Multilingual benchmarking of large language models  
80 for medical question answering. *Artificial Intelligence in Medicine* **155**, 102938 (2024). URL <https://www.sciencedirect.com/science/article/pii/S0933365724001805>.  
81
- 82 29. Hendrycks, D. *et al.* Measuring massive multitask language understanding. In *International Conference*  
83 *on Learning Representations (ICLR)* (2021).
- 84 30. Wang, X. *et al.* Apollo: An lightweight multilingual medical LLM towards democratizing medical AI  
85 to 6b people. *arXiv preprint arXiv:2403.03640* (2024).
- 86 31. Li, H. *et al.* CMMLU: Measuring massive multitask language understanding in Chinese. In Ku, L.-W.,  
87 Martins, A. & Srikumar, V. (eds.) *Findings of the Association for Computational Linguistics: ACL 2024*,  
88 11260–11285 (Association for Computational Linguistics, Bangkok, Thailand, 2024). URL <https://aclanthology.org/2024.findings-acl.671>.  
89
- 90 32. Vilares, D. & Gómez-Rodríguez, C. HEAD-QA: A healthcare dataset for complex reasoning. In Ko-  
91 ronen, A., Traum, D. & Màrquez, L. (eds.) *Proceedings of the 57th Annual Meeting of the Association*  
92 *for Computational Linguistics*, 960–966 (Association for Computational Linguistics, Florence, Italy,  
93 2019).
- 94 33. Labrak, Y. *et al.* FrenchMedMCQA: A French multiple-choice question answering dataset for medical  
95 domain. In Lavelli, A. *et al.* (eds.) *Proceedings of the 13th International Workshop on Health Text*  
96 *Mining and Information Analysis (LOUHI)*, 41–46 (Association for Computational Linguistics, Abu  
97 Dhabi, United Arab Emirates (Hybrid), 2022).
- 98 34. Loshchilov, I. & Hutter, F. Decoupled weight decay regularization. In *International Conference*  
99 *on Learning Representations (ICLR)* (2019). URL <https://openreview.net/forum?id=Bkg6RiCqY7>.  
100
- 101 35. Kwon, W. *et al.* Efficient memory management for large language model serving with pagedattention.  
102 In *Proceedings of the 29th Symposium on Operating Systems Principles*, 611–626 (2023).

| Podcast                                               | Episodes | Audio Time (min) | Mean Length Episode $\pm\sigma$ (min) | Number of Text Tokens | Mean Text Tokens per Episode $\pm\sigma$ |
|-------------------------------------------------------|----------|------------------|---------------------------------------|-----------------------|------------------------------------------|
| NEJM This Week                                        | 457      | 13,300.17        | 29.10 $\pm$ 2.92                      | 2,029,219             | 4440.30 $\pm$ 419.35                     |
| NEJM Interviews                                       | 654      | 9,223.44         | 14.10 $\pm$ 8.15                      | 1,732,879             | 2649.66 $\pm$ 1522.35                    |
| NEJM Core IM   Internal Medicine Podcast              | 170      | 5,285.72         | 31.09 $\pm$ 10.08                     | 1,077,154             | 6336.20 $\pm$ 2093.18                    |
| NEJM Curbside Consults                                | 74       | 1,977.46         | 26.72 $\pm$ 11.04                     | 408,189               | 5516.07 $\pm$ 2522.46                    |
| NEJM Clinical Conversations                           | 108      | 1,829.66         | 16.94 $\pm$ 4.13                      | 320,968               | 2971.93 $\pm$ 774.89                     |
| NEJM Leadership Conversations                         | 100      | 1,765.76         | 17.66 $\pm$ 4.38                      | 306,490               | 3064.90 $\pm$ 759.09                     |
| NEJM AI Grand Rounds                                  | 24       | 1,459.11         | 60.80 $\pm$ 14.84                     | 303,499               | 12645.79 $\pm$ 3107.35                   |
| NEJM Intention to Treat                               | 40       | 997.22           | 24.93 $\pm$ 5.27                      | 169,632               | 4240.80 $\pm$ 954.41                     |
| NEJM Not Otherwise Specified                          | 20       | 836.03           | 41.80 $\pm$ 15.71                     | 146,718               | 7335.90 $\pm$ 2880.36                    |
| TWiV: This Week In Virology                           | 1,186    | 104,089.57       | 87.77 $\pm$ 30.30                     | 20,188,268            | 17022.15 $\pm$ 5785.86                   |
| TWiP: This Week In Parasitism                         | 245      | 21,129.03        | 86.24 $\pm$ 15.35                     | 4,381,511             | 17883.72 $\pm$ 3814.75                   |
| TWiM: This Week in Microbiology                       | 320      | 20,641.50        | 64.50 $\pm$ 10.36                     | 3,667,519             | 11461.00 $\pm$ 2121.78                   |
| TWiEVO: This Week In Evolution                        | 100      | 8,845.09         | 88.45 $\pm$ 10.99                     | 1,756,480             | 17564.80 $\pm$ 2517.80                   |
| IMMUNE                                                | 93       | 6,918.84         | 74.40 $\pm$ 19.67                     | 1,363,176             | 14657.81 $\pm$ 3888.47                   |
| TWiN: This Week In Neuroscience                       | 53       | 3,581.13         | 67.57 $\pm$ 10.40                     | 644,712               | 12164.38 $\pm$ 2078.49                   |
| Matters Microbial                                     | 62       | 3,418.33         | 55.13 $\pm$ 11.33                     | 637,647               | 10284.63 $\pm$ 2357.42                   |
| Infectious Disease Puscast                            | 65       | 2,298.71         | 35.36 $\pm$ 5.96                      | 415,145               | 6386.85 $\pm$ 1126.15                    |
| Urban Agriculture                                     | 29       | 2,171.63         | 74.88 $\pm$ 17.58                     | 443,859               | 15305.48 $\pm$ 4214.82                   |
| On The Wards: On The Pods Medical Podcast for Doctors | 245      | 5,915.14         | 24.14 $\pm$ 8.00                      | 1,175,307             | 4797.17 $\pm$ 1781.74                    |
| Digital Campus Podcast                                | 64       | 3,169.44         | 49.52 $\pm$ 5.85                      | 605,977               | 9322.72 $\pm$ 1528.99                    |
| emDOCs.net Emergency Medicine (EM) Podcast            | 112      | 1,576.72         | 14.08 $\pm$ 4.30                      | 303,672               | 2711.35 $\pm$ 864.29                     |
| Policy in Plain English Podcast                       | 73       | 1,089.20         | 14.92 $\pm$ 7.52                      | 208,580               | 2857.26 $\pm$ 1509.80                    |
| Open Minds ... from Creative Commons                  | 21       | 803.28           | 38.25 $\pm$ 12.79                     | 145,624               | 6619.27 $\pm$ 2722.90                    |
| What is Global Health?                                | 18       | 486.47           | 27.03 $\pm$ 10.02                     | 87,653                | 4869.61 $\pm$ 2054.00                    |
| Consilience Sustainability In Progress (SIP) Podcast  | 9        | 403.95           | 44.88 $\pm$ 17.89                     | 70,461                | 7829.00 $\pm$ 3535.75                    |
| Research Pulse: Future Focussed Health Insights       | 16       | 177.79           | 11.11 $\pm$ 2.29                      | 33,672                | 2104.50 $\pm$ 476.85                     |
| Our People: Central to Healthcare                     | 9        | 161.15           | 17.91 $\pm$ 7.42                      | 31,545                | 3505.00 $\pm$ 1474.57                    |

**Table 1: Podcasts used for model development.** This table summarizes the STEMM podcasts licensed under Creative Commons Attribution (CC-BY) and content from *The New England Journal of Medicine* (NEJM) used for PodGPT’s continual pre-training. It provides key details, including podcast names, episode counts, total audio durations, average episode lengths with standard deviations, text token counts, and average tokens per episode with standard deviations. Podcasts from NEJM, *The Journal of Sustainable Development*, and *The Columbia University Journal of Global Health* offered a broad range of episodes with substantial audio durations and high token volumes, capturing in-depth discussions on critical topics in research and education. The podcast content, transcribed using OpenAI’s Whisper model, forms a diverse and comprehensive dataset that strengthens PodGPT’s knowledge base and comprehension across STEMM domains.

| Language | MMLU Benchmark   | Model    |                     |          |                     |              |                     |
|----------|------------------|----------|---------------------|----------|---------------------|--------------|---------------------|
|          |                  | Gemma 2B |                     | Gemma 7B |                     | LLaMA 8B     |                     |
|          |                  | Baseline | <i>Ours</i>         | Baseline | <i>Ours</i>         | Baseline     | <i>Ours</i>         |
| English  | Physics          | 29.85    | <b>30.74 (0.12)</b> | 42.38    | <b>47.64 (0.64)</b> | 49.83        | <b>58.46 (0.36)</b> |
|          | Biology          | 44.82    | <b>46.58 (0.45)</b> | 63.32    | <b>66.43 (0.58)</b> | 69.06        | <b>78.18 (0.22)</b> |
|          | Chemistry        | 30.04    | <b>30.96 (0.62)</b> | 43.42    | <b>44.14 (1.31)</b> | 48.08        | <b>50.82 (1.08)</b> |
|          | Computer Science | 40.59    | <b>44.20 (0.11)</b> | 53.58    | <b>54.62 (0.29)</b> | 53.10        | <b>57.22 (0.33)</b> |
|          | Engineering      | 39.31    | <b>42.07 (0.49)</b> | 44.14    | <b>47.94 (0.60)</b> | 48.97        | <b>59.31 (0.49)</b> |
|          | Mathematics      | 25.69    | <b>26.44 (0.57)</b> | 34.97    | <b>39.23 (0.16)</b> | <b>50.41</b> | 43.13 (0.62)        |
|          | Medicine         | 40.62    | <b>41.72 (0.15)</b> | 55.22    | <b>59.50 (0.14)</b> | 66.11        | <b>74.05 (0.16)</b> |
|          | Average          | 34.92    | <b>36.36 (0.11)</b> | 47.66    | <b>51.15 (0.27)</b> | 55.89        | <b>59.84 (0.13)</b> |

**Table 2: Performance of PodGPT on English benchmarks.** All models were fine-tuned using English podcast data and evaluated on STEM subsets within MMLU benchmarks, which include physics, biology, chemistry, computer science, engineering, mathematics, and medicine. The performance of baseline models was compared against our PodGPT model (denoted as *Ours*). Bold numbers highlight the best-performing model in each category, showcasing PodGPT’s ability to achieve superior results across various STEM domains.

| Benchmark Datasets |          | MedExpQA            | MedMCQA             | MedQA               | PubMedQA            | MMLU Medicine       | <b>Average</b>      |              |
|--------------------|----------|---------------------|---------------------|---------------------|---------------------|---------------------|---------------------|--------------|
| Model              | Gemma 2B | Baseline            | 19.20               | <b>34.71</b>        | 29.54               | 46.80               | 40.62               | 34.17        |
|                    |          | <i>Ours</i>         | <b>21.20 (0.69)</b> | 34.62 (0.02)        | <b>32.91 (0.15)</b> | <b>54.25 (0.54)</b> | <b>41.72 (0.15)</b> | <b>36.94</b> |
|                    |          | <i>Baseline+RAG</i> | 23.20               | 35.91               | 32.60               | 49.00               | 41.47               | 36.44        |
|                    |          | <i>Ours+RAG</i>     | <b>28.00 (0.00)</b> | <b>35.96 (0.07)</b> | <b>34.43 (0.12)</b> | <b>51.95 (0.78)</b> | <b>42.12 (0.13)</b> | <b>38.49</b> |
|                    | Gemma 7B | Baseline            | 34.40               | 40.69               | 37.78               | <b>61.80</b>        | 55.22               | 45.98        |
|                    |          | <i>Ours</i>         | <b>42.00 (0.89)</b> | <b>44.64 (0.09)</b> | <b>44.14 (0.21)</b> | 57.35 (1.37)        | <b>59.50 (0.14)</b> | <b>49.53</b> |
|                    |          | <i>Baseline+RAG</i> | 35.20               | 40.64               | 39.28               | <b>61.40</b>        | 54.14               | 46.13        |
|                    |          | <i>Ours+RAG</i>     | <b>47.40 (1.18)</b> | <b>43.54 (0.07)</b> | <b>43.32 (0.25)</b> | 55.70 (1.88)        | <b>60.11 (0.39)</b> | <b>50.01</b> |
|                    | LLaMA 8B | Baseline            | 55.20               | 51.28               | 53.50               | 72.00               | 66.11               | 59.62        |
|                    |          | <i>Ours</i>         | <b>62.20 (0.35)</b> | <b>55.90 (0.10)</b> | <b>59.80 (0.25)</b> | <b>73.75 (0.22)</b> | <b>74.05 (0.16)</b> | <b>65.14</b> |
|                    |          | <i>Baseline+RAG</i> | 54.40               | 53.93               | 54.75               | 72.40               | 68.13               | 60.72        |
|                    |          | <i>Ours+RAG</i>     | <b>57.20 (0.40)</b> | <b>54.98 (0.16)</b> | <b>57.07 (0.28)</b> | <b>72.50 (0.22)</b> | <b>71.67 (0.21)</b> | <b>62.68</b> |

**Table 3: Performance of PodGPT with RAG on English benchmarks.** All models were fine-tuned with English STEM pod data and evaluated on various medical QA benchmarks, including MedExpQA, MedMCQA, MedQA, PubMedQA, and the MMLU Medicine subset. For each model, baseline performance was compared against PodGPT (indicated as *Ours*). Additionally, the performance of baseline models integrated with RAG (denoted as *Baseline+RAG*) and PodGPT with RAG (denoted as *Ours+RAG*) was evaluated. The results demonstrated PodGPT’s superior performance, highlighting the effectiveness of incorporating pod data into the training process. Bold numbers indicate the best-performing model in each category.



| Language       | Benchmark Datasets | Model        |                     |              |                     |              |                     |
|----------------|--------------------|--------------|---------------------|--------------|---------------------|--------------|---------------------|
|                |                    | Gemma 2B     |                     | Gemma7B      |                     | LLaMA 8B     |                     |
|                |                    | Baseline     | <i>Ours</i>         | Baseline     | <i>Ours</i>         | Baseline     | <i>Ours</i>         |
| Mandarin       | MedQA-MCMLLE       | <b>33.54</b> | 33.14 (0.13)        | 40.81        | <b>45.20 (0.06)</b> | 56.19        | <b>69.79 (0.22)</b> |
|                | Physics            | <b>32.75</b> | 31.73 (0.37)        | 35.37        | <b>40.13 (0.54)</b> | 36.40        | <b>46.74 (0.12)</b> |
|                | Biology            | 24.26        | <b>25.44 (0.00)</b> | 33.14        | <b>37.43 (0.64)</b> | 28.79        | <b>34.66 (0.63)</b> |
|                | Chemistry          | 25.00        | <b>27.08 (0.32)</b> | 29.55        | <b>37.12 (0.54)</b> | 38.33        | <b>58.32 (0.29)</b> |
|                | Computer Science   | 32.24        | <b>34.18 (0.32)</b> | 40.78        | <b>47.92 (0.59)</b> | 37.98        | <b>48.30 (0.62)</b> |
|                | Engineering        | <b>33.40</b> | 32.05 (0.40)        | 41.72        | <b>45.58 (0.20)</b> | 25.47        | <b>30.24 (0.93)</b> |
|                | Mathematics        | <b>26.82</b> | 24.64 (0.65)        | 27.96        | <b>30.73 (0.81)</b> | 41.66        | <b>53.19 (0.14)</b> |
|                | Medicine           | 31.18        | <b>31.62 (0.15)</b> | 35.72        | <b>39.65 (0.18)</b> | 33.03        | <b>41.53 (0.69)</b> |
|                | <b>Average</b>     | 29.93        | <b>30.03</b>        | 35.66        | <b>40.38</b>        | 37.70        | <b>47.89</b>        |
| French         | MedExpQA           | 19.20        | <b>22.40 (0.00)</b> | 28.00        | <b>37.40 (1.18)</b> | 48.80        | <b>53.40 (0.66)</b> |
|                | FrenchMedMCQA      | <b>31.46</b> | 28.04 (0.22)        | 33.64        | <b>43.69 (0.34)</b> | 49.84        | <b>59.50 (0.38)</b> |
|                | Physics            | 26.93        | <b>28.88 (0.23)</b> | 35.58        | <b>42.65 (0.59)</b> | 44.85        | <b>51.61 (0.19)</b> |
|                | Biology            | 34.51        | <b>39.35 (0.39)</b> | 50.16        | <b>57.04 (0.34)</b> | 44.14        | <b>45.07 (0.71)</b> |
|                | Chemistry          | 26.07        | <b>29.09 (0.32)</b> | 37.98        | <b>40.20 (0.53)</b> | 44.42        | <b>54.18 (0.22)</b> |
|                | Computer Science   | 35.46        | <b>37.40 (0.69)</b> | 44.20        | <b>45.23 (0.70)</b> | 50.34        | <b>58.10 (0.57)</b> |
|                | Engineering        | <b>38.62</b> | 36.20 (0.60)        | 46.90        | <b>47.59 (0.00)</b> | 34.70        | <b>40.33 (0.83)</b> |
|                | Mathematics        | 26.14        | <b>28.01 (0.51)</b> | 30.62        | <b>32.92 (0.98)</b> | 51.43        | <b>59.61 (0.10)</b> |
|                | Medicine           | 32.56        | <b>35.48 (0.12)</b> | 45.80        | <b>51.55 (0.18)</b> | 41.34        | <b>46.58 (0.24)</b> |
| <b>Average</b> | 30.16              | <b>31.77</b> | 39.34               | <b>44.28</b> | 46.55               | <b>53.24</b> |                     |
| Hindi          | Physics            | 25.49        | <b>26.60 (0.56)</b> | 29.32        | <b>33.39 (0.46)</b> | 36.09        | <b>40.15 (0.08)</b> |
|                | Biology            | 29.02        | <b>32.58 (0.18)</b> | 29.28        | <b>39.08 (0.66)</b> | <b>36.20</b> | 34.14 (0.27)        |
|                | Chemistry          | <b>24.08</b> | 20.88 (0.10)        | 35.26        | <b>36.97 (0.90)</b> | 38.47        | <b>47.22 (0.18)</b> |
|                | Computer Science   | <b>32.15</b> | 30.30 (0.40)        | 36.64        | <b>41.49 (0.37)</b> | <b>49.66</b> | 48.10 (1.32)        |
|                | Engineering        | <b>43.45</b> | 42.42 (0.34)        | 40.00        | <b>41.72 (1.04)</b> | 30.50        | <b>33.48 (0.33)</b> |
|                | Mathematics        | <b>25.33</b> | 24.87 (0.24)        | 29.33        | <b>30.96 (0.50)</b> | 37.85        | <b>42.36 (0.13)</b> |
|                | Medicine           | 26.77        | <b>29.07 (0.15)</b> | 34.00        | <b>40.26 (0.21)</b> | 33.42        | <b>35.99 (0.30)</b> |
| <b>Average</b> | 29.27              | <b>29.36</b> | 33.37               | <b>37.65</b> | 37.00               | <b>40.52</b> |                     |
| Spanish        | HEAD-QA            | 33.66        | <b>34.38 (0.10)</b> | 48.32        | <b>52.87 (0.19)</b> | 50.73        | <b>63.60 (0.19)</b> |
|                | MedExpQA           | 21.60        | <b>23.20 (0.00)</b> | 32.80        | <b>37.40 (0.35)</b> | 44.00        | <b>54.20 (0.87)</b> |
|                | Physics            | 28.06        | <b>28.86 (0.26)</b> | 40.64        | <b>43.63 (0.11)</b> | 45.49        | <b>52.22 (0.34)</b> |
|                | Biology            | 30.63        | <b>39.50 (0.55)</b> | 52.19        | <b>57.26 (0.51)</b> | 41.93        | <b>49.23 (0.41)</b> |
|                | Chemistry          | <b>27.06</b> | 25.94 (0.22)        | 35.98        | <b>39.93 (0.36)</b> | 47.43        | <b>56.46 (0.36)</b> |
|                | Computer Science   | 37.09        | <b>40.43 (0.40)</b> | 45.93        | <b>48.04 (0.25)</b> | 53.10        | <b>54.48 (1.29)</b> |
|                | Engineering        | <b>43.45</b> | 38.79 (0.75)        | 47.59        | <b>49.14 (0.89)</b> | 37.12        | <b>37.70 (0.35)</b> |
|                | Mathematics        | <b>26.63</b> | 25.80 (0.14)        | 31.14        | <b>32.79 (0.39)</b> | 48.44        | <b>58.14 (0.46)</b> |
|                | Medicine           | 31.89        | <b>35.54 (0.15)</b> | 45.94        | <b>51.81 (0.44)</b> | 44.36        | <b>52.05 (0.31)</b> |
| <b>Average</b> | 31.12              | <b>32.51</b> | 42.23               | <b>45.83</b> | 46.55               | <b>54.00</b> |                     |

Table 4: **Zero-shot performance of PodGPT on non-English benchmarks.** All models were fine-tuned using English podcast data and evaluated on various multilingual STEM QA benchmarks in languages such as Mandarin, French, Hindi, and Spanish. These benchmarks included MedQA-MCMLLE, FrenchMedMCQA, MedExpQA, HEAD-QA, and STEM subsets within MMLU and CMMLU, covering physics, biology, chemistry, computer science, engineering, mathematics, and medicine. The performance of baseline models was compared to that of our model, PodGPT (denoted as *Ours*), to highlight the impact of integrating podcast data into the training process. Bold numbers indicate the superior performance in each category.

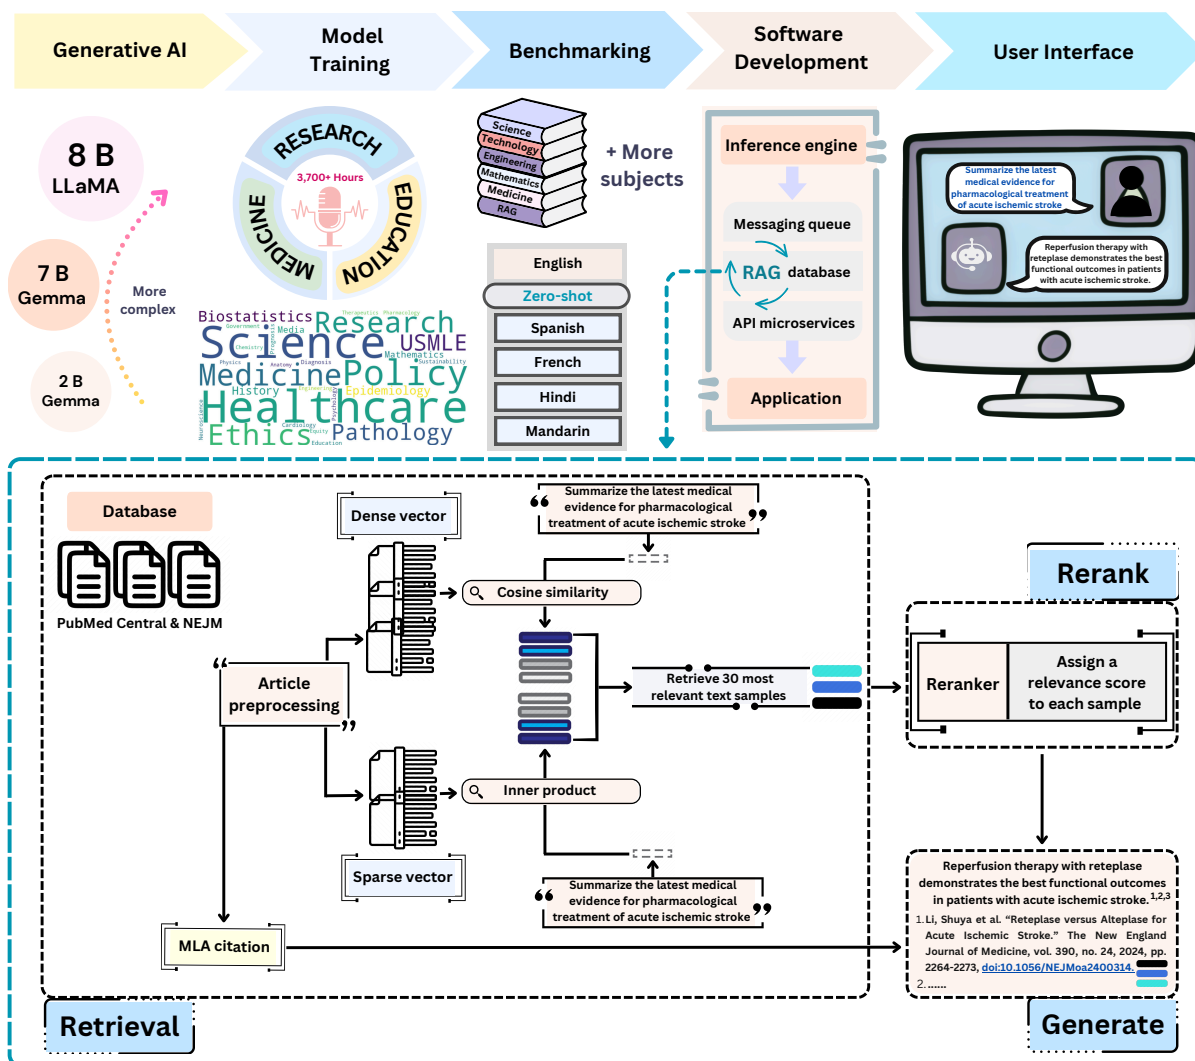

**Figure 1: PodGPT framework.** This figure illustrates the workflow and components involved in the development of PodGPT, an audio-augmented large language model tailored for research and education. The process began by leveraging publicly available generative AI auto-regressive language models across various scales. These models underwent continuous pre-training on a curated dataset of English CC-BY podcasts produced by scientific journals and clinical experts, as well as content from *The New England Journal of Medicine* (NEJM). The podcast corpus comprised over 3,700 hours of audio, covering diverse topics in science, research, and medicine, visually summarized in the accompanying word cloud. Following pre-training, PodGPT was rigorously evaluated against leading English medical question-answering benchmarks, such as MedExpQA, MedMCQA, MedQA, and PubMedQA. It also underwent assessment on STEM subsets within MMLU benchmarks, encompassing subjects like physics, biology, chemistry, computer science, engineering, mathematics, and medicine. Additionally, to evaluate its zero-shot transfer capability, multilingual STEM benchmarks were included, covering widely spoken languages such as Spanish, French, Hindi, and Mandarin. The next phase involved developing the software infrastructure, which included an inference engine for model deployment, a messaging queue, database integration, retrieval augmented generation (RAG) implementation, API microservices, and a responsive human-machine interface. This highly performant and robust system enabled users with internet access to engage seamlessly with current research and educational material via an adaptive chatbot. The chatbot supported multi-turn conversations across various languages, empowering users to access and interact with STEM knowledge in a dynamic and accessible manner.

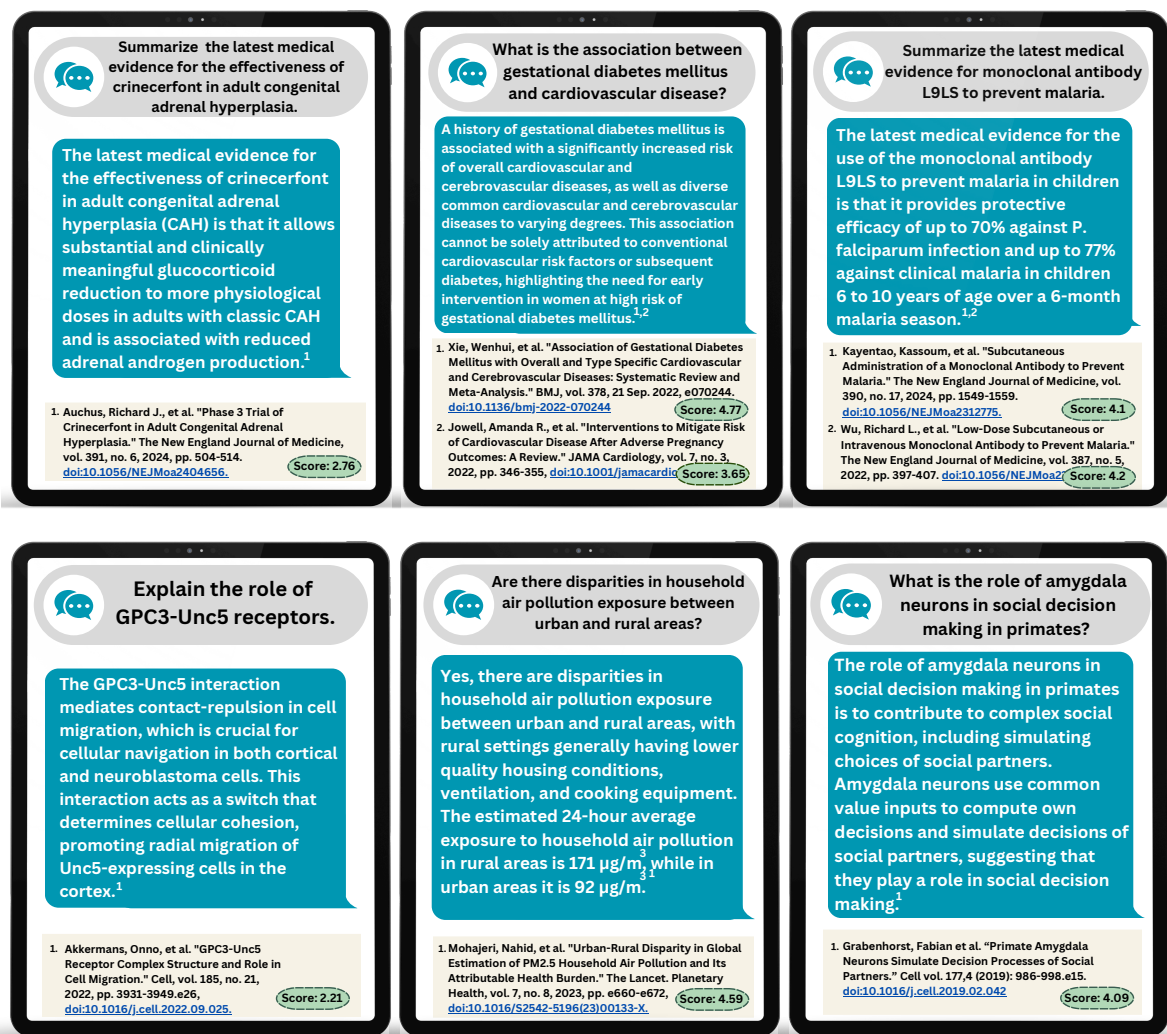

Figure 2: **PodGPT responses on STEM queries.** The evaluation of PodGPT's outputs using the retrieval augmented generation (RAG) framework highlighted its capacity to provide accurate, contextually relevant responses grounded by scientific references. The references were retrieved from a vector database and scored for relevance to the query using the *bge-reranker-large model*. The relevance score quantified the alignment between the query and retrieved references. A higher score indicated a stronger contextual match, with the inclusion of references determined by a tunable score threshold. This hyperparameter allowed for customization to optimize performance based on specific application needs. The examples provided illustrated PodGPT's adeptness at generating precise and contextually grounded outputs across diverse STEM topics, showcasing its reliability in integrating evidence-based information into its responses. This approach underscored the potential of PodGPT to enhance research and education by offering high-quality and citation-supported answers.
